# Supplementary material for: Targeting Glioblastoma Cells Expressing CD44 with Liposomes Encapsulating Doxorubicin and Displaying Chlorotoxin-IgG Fc Fusion Protein
Source: PubMed Central journal article supplement (PMC5877520; doi:10.3390/ijms19030659), 2018-02-26
Supplement: ijms-19-00659-s001.pdf [file ijms-19-00659-s001.pdf]

## Supplementary Documents

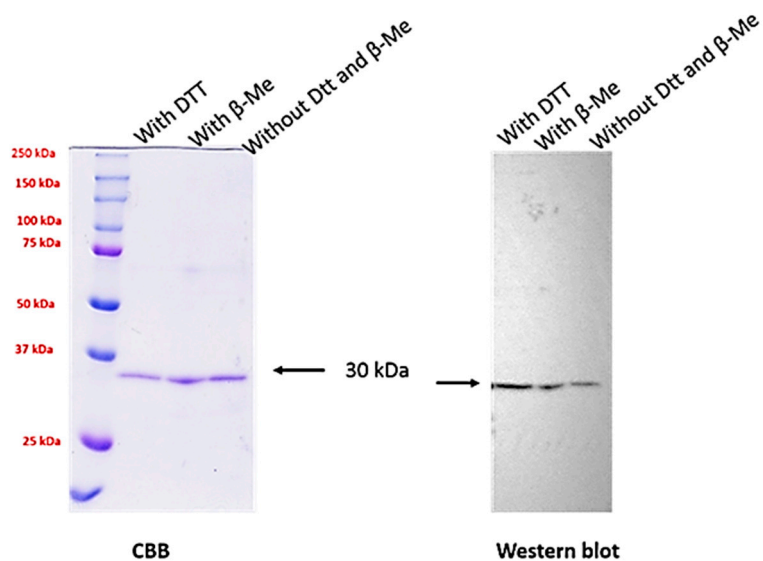

**Figure S1.** M-CTX-Fc in reducing and nonreducing conditions. Purified protein was subjected to SDS-PAGE and detected by CBB staining (left) and Western blotting with mouse monoclonal anti-human IgG antibody (right) as monomer at approximately 30 kDa.

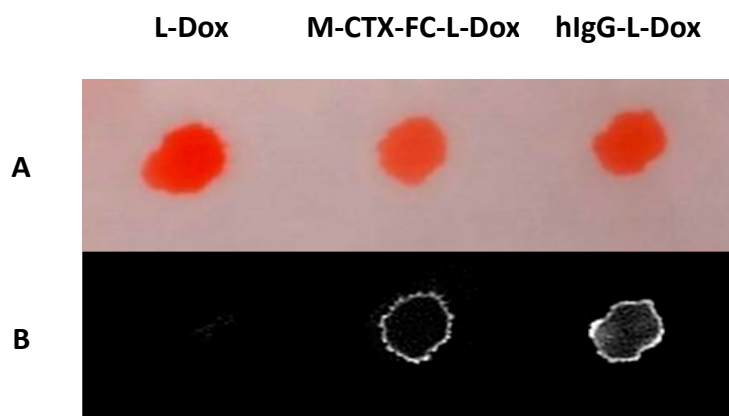

**Figure S2.** Dot blotting analysis of liposomes conjugated to ligands. Liposomes containing approximately 1  $\mu\text{g}$  of doxorubicin in 3  $\mu\text{L}$  were blotted onto PVDF membrane (A) and probed with mouse monoclonal anti-human IgG antibody conjugated with HRP (B). The immunoreactivity indicates the successful conjugation of M-CTX-Fc and hIgG to liposomes.

**Table S1.** Cytotoxicity of different Dox formulations in U251MG-P1 and SK-BR-3.

|                | U251MG-P1                          |                                     |                      | SK-BR-3                            |                                     |                      |
|----------------|------------------------------------|-------------------------------------|----------------------|------------------------------------|-------------------------------------|----------------------|
|                | IC <sub>50</sub> ( $\mu\text{M}$ ) | IC <sub>100</sub> ( $\mu\text{M}$ ) | IT <sub>50</sub> (h) | IC <sub>50</sub> ( $\mu\text{M}$ ) | IC <sub>100</sub> ( $\mu\text{M}$ ) | IT <sub>50</sub> (h) |
| Dox            | 0.19 $\pm$ 0.11                    | 1                                   | 2.3 $\pm$ 0.2        | 0.15 $\pm$ 0.02                    | 1                                   | 3.0 $\pm$ 1.0        |
| L-Dox          | 0.35 $\pm$ 0.08                    | 5                                   | 3.4 $\pm$ 0.4        | 0.21 $\pm$ 0.05                    | 1                                   | 6.0 $\pm$ 0.8        |
| hIgG-L-Dox     | 0.66 $\pm$ 0.05                    | 10                                  | 4.1 $\pm$ 0.6        | 0.38 $\pm$ 0.06                    | 1                                   | 9.5 $\pm$ 0.6        |
| M-CTX-Fc-L-Dox | 0.17 $\pm$ 0.07                    | 1                                   | 1.6 $\pm$ 0.4        | 0.21 $\pm$ 0.04                    | 1                                   | 6.6 $\pm$ 1.6        |

IC<sub>50</sub> and IT<sub>50</sub> are presented as the mean  $\pm$  S.D. ( $n = 3$ ). IC<sub>100</sub> was estimated from the evaluation of cytotoxicity.
